# Supplementary material for: Neuromorphic computation with spiking memristors: habituation, experimental instantiation of logic gates and a novel sequence-sensitive perceptron model
Source: Royal Society of Chemistry journal article supplement (doi:10.1039/c8fd00111a), 2018-08-08
Supplement: c8fd00111a1.xlsx [file c8fd00111a1.xlsx]

## Sheet: AFA
Test	V	I	T
one	0	8.01567e-11	42.4648
1	-0.5	-1.92749e-08	43.5273
1	-0.5	-9.64702e-09	44.5889
1	-0.5	-6.55059e-09	45.6504
	0	1.26869e-08	46.7119
two	0	2.5796e-11	90.2383
1	-0.5	-1.85143e-08	91.2998
1	-0.5	-9.4567e-09	92.3613
0	0.01	1.16212e-08	93.4238
	0	4.14127e-09	94.4853
three	0	2.76416e-11	138.013
1	-0.5	-1.85186e-08	139.074
0	0.01	9.32622e-09	140.137
1	-0.5	-1.56309e-08	141.198
	0	9.77554e-09	142.261
four	0	4.26578e-11	185.787
0	0.01	3.46046e-10	186.849
1	-0.5	-1.87234e-08	187.911
1	-0.5	-9.47863e-09	188.973
	0	1.14026e-08	190.034
five	0	2.73479e-11	233.56
1	-0.5	-1.84798e-08	234.622
0	0.01	8.90769e-09	235.685
0	0.01	3.19361e-09	236.746
	0	1.42802e-09	237.808
six	0	1.17425e-12	281.335
0	0.01	3.265e-10	282.397
1	-0.5	-1.86871e-08	283.459
0	0.01	8.85802e-09	284.522
	0	2.86677e-09	285.583
seven	0	2.50409e-11	329.11
0	0.01	3.34385e-10	330.173
0	0.01	2.06075e-10	331.234
1	-0.5	-1.87475e-08	332.297
	0	8.50098e-09	333.358
eight	0	1.1602e-10	376.885
	0.01	-8.13797e-11	377.946
	0.01	1.50289e-10	379.009
	0.01	6.63568e-11	380.07
	0	-4.97766e-10	381.132

## Sheet: NAND
NAND	V	I	T
AND	0	-6.37566e-12	0
	0	-1.45131e-11	0.0839844
	0.02	2.20215e-09	0.166992
	0.02	5.03643e-10	0.250977
	0	-1.89307e-09	0.334961
	0	-2.95073e-10	0.417969
	0	-1.46235e-10	0.501953
	0	-8.72538e-11	0.584961
	0	-5.88539e-11	0.668945
	0	-5.07995e-11	0.751953
	0	-3.47327e-11	0.835938
	0	-2.51263e-11	0.918945
	0	-2.49585e-11	1.00293
	0	-4.45909e-11	1.08691
	0	-2.07215e-11	1.16992
	0	-2.89017e-11	1.25391
	0	-1.25417e-11	1.33691
	0	-2.74754e-11	1.4209
	0	-1.52262e-11	1.50391
	0	-1.90016e-11	1.58789
	0	-3.35162e-11	1.6709
	0	-2.43712e-11	1.75488
	0	-1.94211e-11	1.83789
	0	-8.431e-12	1.92188
	0	-2.23995e-11	2.00586
	0	-4.28291e-11	2.08887
	0	-2.43712e-11	2.17285
	0	-3.15446e-11	2.25586
	0	-1.50165e-11	2.33984
	0	-4.53004e-12	2.42285
	0	-2.39097e-11	2.50684
	0	-2.50843e-11	2.58984
	0	-1.6191e-11	2.67383
	0	-2.50843e-11	2.75781
	0	-1.26675e-11	2.84082
	0	-1.36742e-11	2.92481
	0	-1.10316e-11	3.00781
	0	-2.23995e-11	3.0918
	0	-2.92793e-11	3.17481
	0	-2.17703e-11	3.25879
	0	-2.99924e-11	3.3418
	0	2.55879e-12	3.42578
	0	-4.21579e-11	3.50879
	0	-2.88598e-11	3.59277
	0.02	2.2014e-09	3.67676
	0.1	9.87789e-09	3.75977
	0	-8.97956e-09	3.84375
	0	-1.07647e-09	3.92676
	0	-4.73737e-10	4.01074
	0	-2.79929e-10	4.09375
	0	-1.99218e-10	4.17773
	0	-1.102e-10	4.26074
	0	-1.15864e-10	4.34473
	0	-9.35464e-11	4.42773
	0	-8.58695e-11	4.51172
	0	-6.10772e-11	4.59473
	0	-5.20161e-11	4.67871
	0	-5.05478e-11	4.76172
	0	-4.74436e-11	4.8457
	0	-5.65466e-11	4.92969
	0	-4.86181e-11	5.01269
	0	-2.76852e-11	5.09668
	0	-3.73336e-11	5.17969
	0	-3.2887e-11	5.26367
	0	-2.55877e-11	5.34668
	0	-3.79209e-11	5.43066
	0	-1.78689e-11	5.51367
	0	-2.99924e-11	5.59766
	0	-1.99664e-11	5.68066
	0	-3.77112e-11	5.76465
	0	-2.5294e-11	5.84863
	0	-3.75014e-11	5.93164
	0	-1.51423e-11	6.01562
	0	-2.86081e-11	6.09863
	0	-2.05118e-11	6.18262
	0	-2.68042e-11	6.26562
	0	-3.09153e-11	6.34961
	0	-4.1235e-11	6.43262
	0	-7.75987e-12	6.5166
	0	-4.19901e-11	6.59961
	0	-1.74914e-11	6.68359
	0	-3.25514e-11	6.76758
	0	-1.6149e-11	6.85059
	0	-4.60172e-11	6.93457
	0	-2.47907e-11	7.01758
	0	-2.60072e-11	7.10156
	0.1	1.20653e-08	7.18457
	0.02	-6.41421e-09	7.26856
	0	-2.69456e-09	7.35156
	0	-6.31259e-10	7.43555
	0	-3.20117e-10	7.51953
	0	-2.05846e-10	7.60254
	0	-1.32518e-10	7.68652
	0	-1.20185e-10	7.76953
	0	-9.00645e-11	7.85352
	0	-9.34625e-11	7.93652
	0	-7.59694e-11	8.02051
	0	-4.38778e-11	8.10352
	0	-5.13449e-11	8.1875
	0	-4.98766e-11	8.27051
	0	-5.47009e-11	8.35449
	0	-2.8692e-11	8.43848
	0	-4.24515e-11	8.52148
	0	-3.71239e-11	8.60547
	0	-3.40615e-11	8.68848
	0	-3.38938e-11	8.77246
	0	-3.68722e-11	8.85547
	0	-2.70979e-11	8.93945
	0	-2.93212e-11	9.02246
	0	-1.28353e-11	9.10645
	0	-4.04799e-11	9.18945
	0	-6.9629e-12	9.27344
	0	-4.57656e-11	9.35742
	0	-3.35162e-11	9.44043
	0	-4.04379e-11	9.52441
	0	-1.48068e-11	9.60742
	0	-2.53779e-11	9.69141
	0	-4.06864e-12	9.77441
	0	-4.32905e-11	9.8584
	0	-2.67623e-11	9.94141
	0	-2.4497e-11	10.0254
	0	-1.73655e-11	10.1094
	0	-2.21478e-11	10.1924
	0	-2.1183e-11	10.2764
	0	-3.19641e-11	10.3594
	0	-2.85242e-11	10.4434
	0	-8.431e-12	10.5264
	0	-2.26932e-11	10.6104
	0.1	1.20823e-08	10.6934
	0.1	2.55937e-09	10.7773
	0	-9.80723e-09	10.8604
	0	-1.43191e-09	10.9443
	0	-6.41788e-10	11.0283
	0	-3.85895e-10	11.1113
	0	-2.55179e-10	11.1953
	0	-2.16501e-10	11.2783
	0	-1.6721e-10	11.3623
	0	-1.25093e-10	11.4453
	0	-1.00091e-10	11.5293
	0	-9.33786e-11	11.6123
	0	-7.00125e-11	11.6963
	0	-8.4695e-11	11.7793
	0	-6.53981e-11	11.8633
	0	-5.85183e-11	11.9463
	0	-4.92893e-11	12.0303
	0	-4.66045e-11	12.1143
	0	-3.32645e-11	12.1973
	0	-4.94991e-11	12.2812
	0	-5.85183e-11	12.3643
	0	-5.27712e-11	12.4482
	0	-2.47906e-11	12.5312
	0	-3.72497e-11	12.6152
	0	-4.43393e-11	12.6982
	0	-3.96409e-11	12.7822
	0	-2.16444e-11	12.8662
	0	-1.91274e-11	12.9492
	0	-2.93212e-11	13.0332
	0	-3.28031e-11	13.1162
	0	-3.1209e-11	13.2002
	0	-4.50943e-11	13.2832
	0	-1.74494e-11	13.3672
	0	-1.27934e-11	13.4502
	0	-2.97827e-11	13.5342
	0	-3.15446e-11	13.6172
	0	-4.25774e-11	13.7012
	0	-2.96988e-11	13.7842
	0	-2.84822e-11	13.8682
	0	-3.27167e-12	13.9521
	0	-4.12769e-11	14.0352
	0	-2.73076e-11	14.1191

## Sheet: repo
	V	I	T
Reproducability	0	-2.30707e-11	0
test	0	-2.25673e-11	0.0830078
	0.1	1.21043e-08	0.166992
	0	-8.79035e-09	0.250977
	0	-9.95846e-10	0.333984
	0	-3.98354e-10	0.417969
	0	-2.58368e-10	0.500977
	0	-1.53367e-10	0.584961
	0	-1.01517e-10	0.667969
	0	-8.12972e-11	0.751953
	0	-6.02383e-11	0.834961
	0	-4.1193e-11	0.918945
	0	-6.61952e-11	1.00195
	0	-4.76534e-11	1.08594
	0	-4.27452e-11	1.16992
	0	-1.21222e-11	1.25293
	0	-2.05537e-11	1.33691
	0	-2.09732e-11	1.41992
	0	-3.13348e-11	1.50391
	0	-3.55299e-11	1.58691
	0	-3.22997e-11	1.6709
	0	-1.00656e-12	1.75391
	0	-1.84143e-11	1.83789
	0	-1.51004e-11	1.9209
	0	-5.54141e-11	2.00488
	0	-3.27611e-11	2.08887
	0	-2.91954e-11	2.17188
	0	-1.38001e-11	2.25586
	0	-4.11057e-12	2.33887
	0	-1.03605e-11	2.42285
	0	-4.1235e-11	2.50586
	0	-1.83723e-11	2.58984
	0	-4.27872e-11	2.67285
	0	1.24581e-11	2.75684
	0	-2.35322e-11	2.83984
	0	-2.69301e-11	2.92383
	0	-1.52262e-11	3.00781
	0	-1.92113e-11	3.09082
	0	-2.6217e-11	3.17481
	0	2.01761e-11	3.25781
	0	7.29871e-12	3.3418
	0	1.43875e-11	3.42481
	0	-4.06897e-11	3.50879
	0.1	1.21347e-08	3.5918
	0	-8.8085e-09	3.67578
	0	-9.90518e-10	3.75977
	0	-3.99948e-10	3.84277
	0	-2.1927e-10	3.92676
	0	-1.72748e-10	4.00977
	0	-1.10452e-10	4.09375
	0	-9.02744e-11	4.17676
	0	-4.84085e-11	4.26074
	0	-5.2142e-11	4.34375
	0	-3.86761e-11	4.42773
	0	-6.16646e-11	4.51074
	0	-6.08675e-11	4.59473
	0	-3.91375e-11	4.67773
	0	-1.73655e-11	4.76172
	0	-3.43972e-11	4.8457
	0	-1.41356e-11	4.92871
	0	-4.31227e-11	5.01269
	0	-3.66625e-11	5.0957
	0	-4.23677e-11	5.17969
	0	-1.75333e-11	5.26269
	0	-1.04024e-11	5.34668
	0	-6.83705e-12	5.42969
	0	-3.35582e-11	5.51367
	0	-1.66524e-11	5.59668
	0	-3.3684e-11	5.68066
	0	1.59406e-12	5.76465
	0	-2.47068e-11	5.84766
	0	8.34736e-12	5.93164
	0	-3.5362e-11	6.01465
	0	-3.23836e-11	6.09863
	0	-2.25673e-11	6.18164
	0	-2.29449e-11	6.26562
	0	-1.35064e-11	6.34863
	0	-5.07532e-12	6.43262
	0	-3.05378e-11	6.51562
	0	-1.55198e-11	6.59961
	0	-3.4565e-11	6.68359
	0	4.20705e-14	6.7666
	0	-7.75985e-12	6.85059
	0	-8.09542e-12	6.93359
	0.1	1.21238e-08	7.01758
	0	-8.82058e-09	7.10059
	0	-9.97608e-10	7.18457
	0	-4.12408e-10	7.26758
	0	-2.40413e-10	7.35156
	0	-1.5043e-10	7.43457
	0	-1.36126e-10	7.51856
	0	-9.4763e-11	7.60156
	0	-7.71441e-11	7.68555
	0	-4.15706e-11	7.76856
	0	-3.47748e-11	7.85254
	0	-4.85762e-11	7.93652
	0	-5.17644e-11	8.01953
	0	-4.57656e-11	8.10352
	0	-4.3794e-11	8.18652
	0	-2.00503e-11	8.27051
	0	-3.1251e-11	8.35352
	0	-2.25673e-11	8.4375
	0	-4.59754e-11	8.52051
	0	-3.82146e-11	8.60449
	0	-2.65945e-11	8.6875
	0	-2.42034e-11	8.77148
	0	-9.10212e-12	8.85449
	0	-4.6978e-12	8.93848
	0	-4.25355e-11	9.02246
	0	-1.47648e-11	9.10547
	0	-3.22578e-11	9.18945
	0	-1.79109e-11	9.27246
	0	-5.83035e-12	9.35645
	0	-9.47964e-12	9.43945
	0	-2.71818e-11	9.52344
	0	-3.78371e-11	9.60645
	0	-1.3842e-11	9.69043
	0	-1.09046e-12	9.77441
	0	-1.79948e-11	9.85742
	0	-2.66784e-11	9.94141
	0	-3.68303e-11	10.0244
	0	-1.53521e-11	10.1084
	0	-2.26932e-11	10.1914
	0	-1.21642e-11	10.2754
	0	-1.61071e-11	10.3584
	0.1	1.21341e-08	10.4424
	0	-8.80075e-09	10.5264
	0	-1.01007e-09	10.6094
	0	-4.33802e-10	10.6934
	0	-2.09915e-10	10.7764
	0	-1.62596e-10	10.8604
	0	-1.00804e-10	10.9434
	0	-1.05586e-10	11.0273
	0	-9.68605e-11	11.1104
	0	-6.3846e-11	11.1943
	0	-2.86501e-11	11.2773
	0	-4.92894e-11	11.3613
	0	-3.2048e-11	11.4443
	0	-6.72859e-11	11.5283
	0	-3.23836e-11	11.6123
	0	-4.2116e-11	11.6953
	0	-1.91274e-11	11.7793
	0	-2.74335e-11	11.8623
	0	-1.66104e-11	11.9463
	0	-4.98347e-11	12.0293
	0	-3.58654e-11	12.1133
	0	-4.01863e-11	12.1963
	0	-9.35379e-12	12.2803
	0	-1.59812e-11	12.3633
	0	-7.96959e-12	12.4473
	0	-4.01443e-11	12.5312
	0	-3.13348e-11	12.6143
	0	-1.68621e-11	12.6982
	0	-1.84982e-11	12.7812
	0	-3.22997e-11	12.8652
	0	-1.74914e-11	12.9482
	0	-4.58495e-11	13.0322
	0	-3.22997e-11	13.1152
	0	-3.57396e-11	13.1992
	0	-8.43099e-12	13.2822
	0	-1.99245e-11	13.3662
	0	-2.31966e-11	13.4492
	0	-3.9557e-11	13.5332
	0	-2.55458e-11	13.6172
	0	-2.2861e-11	13.7002
	0	5.99839e-12	13.7842
	0.1	1.21352e-08	13.8672
	0	-8.81392e-09	13.9512
	0	-1.0331e-09	14.0342
	0	-4.2365e-10	14.1182
	0	-2.60549e-10	14.2012
	0	-1.43761e-10	14.2852
	0	-1.04705e-10	14.3682
	0	-8.77155e-11	14.4521
	0	-9.18265e-11	14.5352
	0	-6.61952e-11	14.6191
	0	-6.48947e-11	14.7031
	0	-4.38779e-11	14.7861
	0	-4.92474e-11	14.8701
	0	-1.40517e-11	14.9531
	0	-5.00025e-11	15.0371
	0	-3.09153e-11	15.1201
	0	-3.1209e-11	15.2041
	0	-7.42428e-12	15.2871
	0	-4.01024e-11	15.3711
	0	-2.58814e-11	15.4541
	0	-5.10093e-11	15.5381
	0	-4.58076e-11	15.6221
	0	-3.80468e-11	15.7051
	0	-1.96308e-11	15.7891
	0	-2.92374e-11	15.8721
	0	-1.7827e-11	15.956
	0	-6.14968e-11	16.0391
	0	-3.14607e-11	16.123
	0	-3.84244e-11	16.2061
	0	2.04697e-11	16.29
	0	-2.30707e-11	16.373
	0	-2.37839e-11	16.457
	0	-3.28031e-11	16.541
	0	-3.21739e-11	16.624
	0	-1.66104e-11	16.708
	0	4.94976e-12	16.791
	0	-1.76172e-11	16.875
	0	-1.56876e-11	16.958
	0	-3.4565e-11	17.042
	0	-2.26512e-11	17.125
	0	-3.86761e-11	17.209
	0.1	1.21292e-08	17.292
	0	-8.8073e-09	17.376
	0	-9.74159e-10	17.46
	0	-4.53476e-10	17.543
	0	-2.40119e-10	17.627
	0	-1.57562e-10	17.71
	0	-9.32529e-11	17.7939
	0	-8.77155e-11	17.877
	0	-4.69822e-11	17.9609
	0	-8.90159e-11	18.0439
	0	-6.92576e-11	18.1279
	0	-4.56398e-11	18.2109
	0	-2.84823e-11	18.2949
	0	-3.39357e-11	18.3789
	0	-2.61331e-11	18.4619
	0	-7.68505e-11	18.5459
	0	-4.27033e-11	18.6289
	0	-3.82985e-11	18.7129
	0	-3.48137e-12	18.7959
	0	-3.74176e-11	18.8799
	0	-3.24255e-11	18.9629
	0	-3.49006e-11	19.0469
	0	-2.50843e-11	19.1309
	0	-2.94891e-11	19.2139
	0	-1.54779e-11	19.2979
	0	-2.7056e-11	19.3809
	0	-1.56457e-11	19.4648
	0	-4.34584e-11	19.5479
	0	-2.71818e-11	19.6318
	0	-4.18643e-11	19.7148
	0	2.47493e-12	19.7988
	0	-1.46809e-11	19.8828
	0	-7.67596e-12	19.9658
	0	-4.1277e-11	20.0498
	0	-1.84982e-11	20.1328
	0	-3.51523e-11	20.2168
	0	7.29873e-12	20.2998
	0	-1.78689e-11	20.3838
	0	-1.28773e-11	20.4668
	0	-3.31807e-11	20.5508
	0	-3.26353e-11	20.6338
	0.1	1.21341e-08	20.7178
	0	-8.80335e-09	20.8018
	0	-1.00772e-09	20.8848
	0	-4.02213e-10	20.9688
	0	-2.73637e-10	21.0518
	0	-1.61715e-10	21.1357
	0	-1.32518e-10	21.2188
	0	-7.46691e-11	21.3027
	0	-7.99548e-11	21.3857
	0	-5.90637e-11	21.4697
	0	-6.56079e-11	21.5527
	0	-5.98188e-11	21.6367
	0	-7.16067e-11	21.7197
	0	-2.37e-11	21.8037
	0	-3.73756e-11	21.8877
	0	-1.66524e-11	21.9707
	0	-4.97089e-11	22.0547
	0	-1.42195e-11	22.1377
	0	-1.79109e-11	22.2217
	0	-2.18961e-11	22.3047
	0	-3.68722e-11	22.3887
	0	-1.87918e-11	22.4727
	0	-3.42713e-11	22.5557
	0	-2.1183e-11	22.6396
	0	-3.22578e-11	22.7227
	0	-1.96308e-11	22.8066
	0	-1.1493e-11	22.8896
	0	-1.85821e-11	22.9736
	0	-2.96569e-11	23.0566
	0	-2.63009e-11	23.1406
	0	-3.64527e-11	23.2236
	0	-5.41087e-12	23.3076
	0	-3.2048e-11	23.3916
	0	-1.90855e-11	23.4746
	0	-2.67204e-11	23.5586
	0	-1.8666e-11	23.6416
	0	-1.5394e-11	23.7256
	0	-1.3087e-11	23.8086
	0	-8.13736e-12	23.8926
	0	-2.15186e-11	23.9756
	0	-2.83145e-11	24.0596
	0.1	1.21356e-08	24.1426
	0	-8.80734e-09	24.2266
	0	-1.0013e-09	24.3105
	0	-4.17819e-10	24.3936
	0	-2.57738e-10	24.4775
	0	-1.66875e-10	24.5605
	0	-1.22828e-10	24.6445
	0	-6.41397e-11	24.7275
	0	-5.25615e-11	24.8115
	0	-7.83187e-11	24.8945
	0	-6.46012e-11	24.9785
	0	-4.81148e-11	25.0615
	0	-3.6201e-11	25.1455
	0	-2.39936e-11	25.2295
	0	-4.7947e-11	25.3125
	0	-2.75174e-11	25.3965
	0	-6.21261e-11	25.4795
	0	-4.2116e-11	25.5635
	0	-3.67464e-11	25.6465
	0	-2.05957e-11	25.7305
	0	-2.75174e-11	25.8135
	0	-2.4497e-11	25.8975
	0	-4.50525e-11	25.9805
	0	-1.4639e-11	26.0645
	0	-2.94052e-11	26.1475
	0	-1.25417e-11	26.2314
	0	-2.14347e-11	26.3154
	0	-1.39678e-11	26.3984
	0	-3.92634e-11	26.4824
	0	-1.82045e-11	26.5654
	0	-2.39097e-11	26.6494
	0	-1.74075e-11	26.7324
	0	-3.18383e-11	26.8164
	0	-1.73655e-11	26.8994
	0	-3.23836e-11	26.9834
	0	-2.02601e-11	27.0664
	0	-2.70979e-11	27.1504
	0	-2.63428e-11	27.2344
	0	-2.12249e-11	27.3174
	0	-2.29449e-11	27.4014
	0	-1.23739e-11	27.4844
	0.1	1.2134e-08	27.5684
	0	-8.8127e-09	27.6514
	0	-1.00482e-09	27.7354
	0	-4.24447e-10	27.8184
	0	-2.47796e-10	27.9023
	0	-1.53115e-10	27.9854
	0	-1.33567e-10	28.0693
	0	-8.02904e-11	28.1523
	0	-6.3888e-11	28.2363
	0	-5.50785e-11	28.3203
	0	-7.20263e-11	28.4033
	0	-5.15967e-11	28.4873
	0	-5.21839e-11	28.5703
	0	-3.33065e-11	28.6543
	0	-2.51682e-11	28.7373
	0	-3.13768e-11	28.8213
	0	-4.91636e-11	28.9043
	0	-3.15446e-11	28.9883
	0	-5.23098e-11	29.0713
	0	-2.0344e-11	29.1553
	0	-3.09573e-11	29.2393
	0	-1.38001e-11	29.3223
	0	-2.35322e-11	29.4062
	0	-2.70979e-11	29.4893
	0	-2.3658e-11	29.5732
	0	-1.67363e-11	29.6562
	0	-1.77431e-11	29.7402
	0	-2.09313e-11	29.8232
	0	-3.23836e-11	29.9072
	0	-2.62589e-11	29.9902
	0	-2.26494e-12	30.0742
	0	-1.74914e-11	30.1582
	0	-2.80208e-11	30.2412
	0	-3.34743e-11	30.3252
	0	-3.58654e-11	30.4082
	0	-1.90435e-11	30.4922
	0	-2.08054e-11	30.5752
	0	-1.79109e-11	30.6592
	0	-2.81886e-11	30.7422
	0	-2.30707e-11	30.8262
	0	-1.60232e-11	30.9092
	0.1	1.21232e-08	30.9932
	0	-8.79966e-09	31.0771
	0	-9.89261e-10	31.1602
	0	-4.13918e-10	31.2441
	0	-2.50985e-10	31.3271
	0	-1.81809e-10	31.4111
	0	-1.27023e-10	31.4941
	0	-9.15329e-11	31.5781
	0	-7.95353e-11	31.6611
	0	-6.3888e-11	31.7451
	0	-6.01544e-11	31.8281
	0	-5.99027e-11	31.9121
	0	-4.57237e-11	31.9951
	0	-2.65106e-11	32.0791
	0	-3.43553e-11	32.1631
	0	-2.33644e-11	32.2461
	0	-5.1261e-11	32.3301
	0	-2.72657e-11	32.4131
	0	-5.65048e-11	32.4971
	0	-1.84982e-11	32.5801
	0	-3.51103e-11	32.6641
	0	-3.81727e-11	32.7471
	0	-3.69142e-11	32.831
	0	-1.56876e-11	32.9141
	0	-2.58394e-11	32.998
	0	-3.85502e-11	33.082
	0	-1.29192e-11	33.165
	0	-2.94052e-11	33.249
	0	-3.35582e-11	33.332
	0	-1.9463e-11	33.416
	0	-3.34743e-11	33.499
	0	-1.68202e-11	33.583
	0	-2.14347e-11	33.666
	0	-2.82725e-11	33.75
	0	-2.18105e-12	33.833
	0	-3.05378e-11	33.917
	0	-3.3726e-11	34.001
	0	-1.55618e-11	34.084
	0	-2.09313e-11	34.168
	0	-1.59812e-11	34.251
	0	-2.01342e-11	34.335
	-0.1	-1.15045e-08	34.419
	0	9.61014e-09	34.502
	0	1.04638e-09	34.5859
	0	3.69292e-10	34.6699
	0	2.15434e-10	34.7529
	0	1.2848e-10	34.8369
	0	8.48147e-11	34.9199
	0	6.53518e-11	35.0039
	0	4.5805e-11	35.0869
	0	1.65688e-11	35.1709
	0	1.27097e-11	35.2539
	0	2.16023e-11	35.3379
	0	6.04034e-12	35.4219
	0	7.9279e-12	35.5049
	0	8.59905e-12	35.5889
	0	-1.27514e-11	35.6719
	0	-9.18601e-12	35.7559
	0	-1.62749e-11	35.8389
	0	-1.88757e-11	35.9228
	0	5.36922e-12	36.0059
	0	-2.25254e-11	36.0898
	0	-2.00503e-11	36.1738
	0	-7.59207e-12	36.2568
	0	-2.18542e-11	36.3408
	0	-1.17437e-12	36.4238
	0	-6.7101e-13	36.5078
	0	-1.16608e-11	36.5908
	0	-1.18286e-11	36.6748
	0	-3.40197e-11	36.7578
	0	-9.94104e-12	36.8418
	0	-2.94051e-11	36.9248
	0	-2.89412e-12	37.0088
	0	-2.00923e-11	37.0928
	0	-2.89857e-11	37.1758
	0	1.04878e-12	37.2598
	0	-1.3842e-11	37.3428
	0	-1.70299e-11	37.4268
	0	-1.33806e-11	37.5098
	0	-1.06122e-11	37.5938
	0	-5.91423e-12	37.6768
	0	-1.81626e-11	37.7607
	-0.1	-1.15216e-08	37.8447
	0	9.60606e-09	37.9277
	0	1.03581e-09	38.0117
	0	4.04149e-10	38.0947
	0	1.95971e-10	38.1787
	0	1.38673e-10	38.2617
	0	8.82961e-11	38.3457
	0	4.95381e-11	38.4287
	0	4.43789e-11	38.5127
	0	2.06375e-11	38.5957
	0	1.3297e-11	38.6797
	0	1.83724e-11	38.7637
	0	3.69137e-12	38.8467
	0	1.72399e-11	38.9307
	0	-1.02347e-11	39.0137
	0	4.19472e-12	39.0977
	0	3.39775e-12	39.1807
	0	-7.7179e-12	39.2647
	0	-8.01153e-12	39.3477
	0	-1.56037e-11	39.4316
	0	-3.10386e-12	39.5156
	0	-1.66104e-11	39.5986
	0	-2.93607e-12	39.6826
	0	-1.34225e-11	39.7656
	0	-8.2632e-12	39.8496
	0	-2.57975e-11	39.9326
	0	1.0193e-11	40.0166
	0	-1.51004e-11	40.0996
	0	-1.27934e-11	40.1836
	0	-1.58973e-11	40.2676
	0	-5.11726e-12	40.3506
	0	-7.67596e-12	40.4346
	0	-3.84663e-11	40.5176
	0	4.06889e-12	40.6016
	0	2.09742e-12	40.6846
	0	-2.71818e-11	40.7685
	0	-2.46648e-11	40.8516
	0	-1.64426e-11	40.9355
	0	-3.71659e-11	41.0195
	0	-4.14867e-11	41.1025
	0	4.48834e-12	41.1865
	-0.1	-1.15188e-08	41.2695
	0	9.61508e-09	41.3535
	0	1.03287e-09	41.4365
	0	3.99241e-10	41.5205
	0	1.98866e-10	41.6035
	0	1.05494e-10	41.6875
	0	9.20714e-11	41.7715
	0	4.55114e-11	41.8545
	0	4.8112e-11	41.9385
	0	2.07634e-11	42.0215
	0	2.74747e-11	42.1055
	0	1.95469e-11	42.1885
	0	2.98656e-11	42.2725
	0	4.74004e-12	42.3555
	0	1.92964e-12	42.4395
	0	-9.06017e-12	42.5234
	0	5.74672e-12	42.6065
	0	-1.99245e-11	42.6904
	0	-3.98472e-12	42.7734
	0	5.32726e-12	42.8574
	0	-1.62749e-11	42.9404
	0	-1.84548e-12	43.0244
	0	-4.06861e-12	43.1074
	0	-9.77324e-12	43.1914
	0	-2.29868e-11	43.2754
	0	-1.79528e-11	43.3584
	0	-2.69721e-11	43.4424
	0	-1.27514e-11	43.5254
	0	7.67624e-12	43.6094
	0	-1.64846e-11	43.6924
	0	-2.12669e-11	43.7764
	0	-2.35741e-11	43.8594
	0	-9.89909e-12	43.9434
	0	-1.61071e-11	44.0264
	0	-3.41874e-11	44.1103
	0	-1.01927e-11	44.1943
	0	-1.59812e-11	44.2773
	0	-2.85242e-11	44.3613
	0	-1.47229e-11	44.4443
	0	-7.96958e-12	44.5283
	0	-2.47487e-11	44.6113
	-0.1	-1.14864e-08	44.6953
	0	9.60389e-09	44.7783
	0	1.057e-09	44.8623
	0	4.05239e-10	44.9463
	0	2.19839e-10	45.0293
	0	1.31878e-10	45.1133
	0	6.11992e-11	45.1963
	0	6.58971e-11	45.2803
	0	2.67616e-11	45.3633
	0	3.69964e-11	45.4473
	0	2.22315e-11	45.5303
	0	-3.98472e-12	45.6143
	0	-6.41758e-12	45.6973
	0	1.12836e-11	45.7812
	0	-5.41089e-12	45.8652
	0	9.98326e-12	45.9482
	0	-1.52262e-11	46.0322
	0	-1.01508e-11	46.1152
	0	-2.00503e-11	46.1992
	0	-2.00503e-11	46.2822
	0	-1.48907e-11	46.3662
	0	1.8038e-12	46.4492
	0	-2.68043e-11	46.5332
	0	-8.68266e-12	46.6162
	0	-9.68936e-12	46.7002
	0	-1.02347e-11	46.7842
	0	-1.28353e-11	46.8672
	0	-1.79948e-11	46.9512
	0	-1.55618e-11	47.0342
	0	-3.21739e-11	47.1182
	0	-7.38234e-12	47.2012
	0	-1.9463e-11	47.2852
	0	1.88771e-12	47.3691
	0	-4.57196e-12	47.4522
	0	-1.35903e-11	47.5361
	0	-2.47068e-11	47.6191
	0	-1.47648e-11	47.7031
	0	-8.97628e-12	47.7861
	0	5.87389e-13	47.8701
	0	-1.1493e-11	47.9531
	0	1.18289e-11	48.0371
	-0.1	-1.14807e-08	48.1201
	0	9.59255e-09	48.2041
	0	1.05423e-09	48.2881
	0	4.0591e-10	48.3711
	0	2.03689e-10	48.4551
	0	1.38799e-10	48.5381
	0	8.85898e-11	48.6221
	0	5.54525e-11	48.7051
	0	3.77095e-11	48.7891
	0	3.66189e-11	48.8721
	0	2.05117e-11	48.956
	0	3.22996e-12	49.0391
	0	-3.27164e-12	49.123
	0	-2.85219e-12	49.207
	0	1.34648e-11	49.29
	0	1.80381e-12	49.374
	0	1.19128e-11	49.457
	0	-6.20785e-12	49.541
	0	-1.75753e-11	49.624
	0	-1.99245e-11	49.708
	0	5.03488e-13	49.791
	0	6.12424e-12	49.875
	0	3.18802e-12	49.958
	0	-7.00482e-12	50.042
	0	-1.41776e-11	50.126
	0	-1.34225e-11	50.209
	0	2.34911e-12	50.293
	0	-1.13672e-11	50.376
	0	2.2652e-12	50.46
	0	-2.58814e-11	50.543
	0	-3.6072e-12	50.627
	0	-3.19222e-11	50.71
	0	-6.66925e-12	50.794
	0	-1.37162e-11	50.8779
	0	-1.75333e-11	50.9609
	0	-1.53101e-11	51.0449
	0	-1.05702e-11	51.1279
	0	-3.5404e-11	51.2119
	0	-5.07531e-12	51.2949
	0	-1.078e-11	51.3789
	0	-9.68936e-12	51.4619
	-0.1	-1.14856e-08	51.5459
	0	9.60258e-09	51.6299
	0	1.05007e-09	51.7129
	0	4.01758e-10	51.7969
	0	2.16315e-10	51.8799
	0	1.28229e-10	51.9639
	0	1.13086e-10	52.0469
	0	6.09056e-11	52.1309
	0	3.8884e-11	52.2139
	0	3.91776e-11	52.2978
	0	1.70721e-11	52.3809
	0	2.04697e-11	52.4648
	0	2.58388e-11	52.5488
	0	1.09061e-11	52.6318
	0	1.27517e-11	52.7158
	0	2.72662e-12	52.7988
	0	-1.2332e-11	52.8828
	0	-3.98473e-12	52.9658
	0	-9.85715e-12	53.0498
	0	-6.96288e-12	53.1328
	0	2.6008e-12	53.2168
	0	-4.36224e-12	53.3008
	0	-1.17435e-12	53.3838
	0	-3.27611e-11	53.4678
	0	-1.37162e-11	53.5508
	0	-1.14511e-11	53.6348
	0	2.28187e-11	53.7178
	0	-7.88569e-12	53.8018
	0	-3.48137e-12	53.8848
	0	-2.07635e-11	53.9688
	0	-1.38e-11	54.0527
	0	-2.01762e-11	54.1357
	0	-3.64913e-12	54.2197
	0	-3.41035e-11	54.3027
	0	-8.59876e-12	54.3867
	0	-3.04539e-11	54.4697
	0	-2.7895e-11	54.5537
	0	-1.58973e-11	54.6367
	0	-7.46622e-12	54.7207
	0	2.5169e-12	54.8037
	0	-2.54199e-11	54.8877
	-0.1	-1.15128e-08	54.9717
	0	9.63535e-09	55.0547
	0	1.03648e-09	55.1387
	0	4.05407e-10	55.2217
	0	2.11114e-10	55.3057
	0	1.07549e-10	55.3887
	0	7.69289e-11	55.4727
	0	5.85146e-11	55.5557
	0	5.01255e-11	55.6397
	0	5.29358e-11	55.7236
	0	3.62834e-11	55.8066
	0	8.47321e-12	55.8906
	0	-7.96833e-13	55.9736
	0	7.13221e-13	56.0576
	0	1.89177e-11	56.1406
	0	-1.19964e-11	56.2246
	0	8.22153e-12	56.3076
	0	-1.35903e-11	56.3916
	0	-1.71964e-12	56.4756
	0	-2.29029e-11	56.5586
	0	2.00922e-11	56.6426
	0	-4.6978e-12	56.7256
	0	2.22328e-12	56.8096
	0	-2.75594e-11	56.8926
	0	-1.01927e-11	56.9766
	0	-2.81467e-11	57.0596
	0	3.22996e-12	57.1435
	0	-1.61071e-11	57.2275
	0	-8.3471e-12	57.3105
	0	-1.37162e-11	57.3945
	0	-2.12669e-11	57.4775
	0	-2.02181e-11	57.5615
	0	3.4397e-12	57.6445
	0	-1.61071e-11	57.7285
	0	-5.41088e-12	57.8115
	0	-1.59812e-11	57.8955
	0	-1.37581e-11	57.9795
	0	2.09855e-13	58.0625
	0	-6.29174e-12	58.1465
	0	-8.38904e-12	58.2295
	0	-5.45156e-13	58.3135
	-0.1	-1.15191e-08	58.3965
	0	9.59223e-09	58.4805
	0	1.05402e-09	58.5635
	0	4.12076e-10	58.6475
	0	2.1103e-10	58.7305
	0	1.16106e-10	58.8145
	0	8.70797e-11	58.8975
	0	3.1124e-11	58.9815
	0	5.5956e-11	59.0654
	0	4.46725e-11	59.1484
	0	9.94132e-12	59.2324
	0	1.84576e-12	59.3154
	0	2.85245e-12	59.3994
	0	3.81721e-12	59.4824
	0	2.43707e-11	59.5664
	0	5.95644e-12	59.6494
	0	-7.08872e-12	59.7334
	0	-1.44712e-11	59.8164
	0	-1.23739e-11	59.9004
	0	-1.11994e-11	59.9844
	0	8.89264e-12	60.0674
	0	1.17462e-12	60.1514
	0	-7.92763e-12	60.2344
	0	-1.87079e-11	60.3184
	0	-1.45551e-11	60.4014
	0	-2.13508e-11	60.4853
	0	1.34239e-12	60.5684
	0	-1.61071e-11	60.6523
	0	-9.89909e-12	60.7363
	0	-2.73496e-11	60.8193
	0	-6.45952e-12	60.9033
	0	-2.92374e-11	60.9863
	0	-1.22481e-11	61.0703
	0	-8.8085e-12	61.1533
	0	-9.43769e-12	61.2373
	0	-1.88338e-11	61.3203
	0	-1.11155e-11	61.4043
	0	-3.15446e-11	61.4873
	0	7.5504e-12	61.5713
	0	-5.2431e-12	61.6553
	0	-1.92952e-11	61.7383
	-0.1	-1.15029e-08	61.8223
	0	9.6184e-09	61.9053
	0	1.03695e-09	61.9893
	0	4.01716e-10	62.0723
	0	1.97355e-10	62.1562
	0	1.33136e-10	62.2393
	0	8.5318e-11	62.3232
	0	7.1434e-11	62.4062
	0	5.64592e-11	62.4902
	0	2.93203e-11	62.5742
	0	2.177e-11	62.6572
	0	-8.97628e-12	62.7412
	0	1.73238e-11	62.8242
	0	5.1595e-12	62.9082
	0	1.43037e-11	62.9912
	0	1.56459e-11	63.0752
	0	2.26522e-12	63.1582
	0	-1.7827e-11	63.2422
	0	-1.31289e-11	63.3252
	0	-2.98666e-11	63.4092
	0	1.22903e-11	63.4932
	0	2.43299e-12	63.5762
	0	1.09072e-12	63.6602
	0	-6.29174e-12	63.7432
	0	-2.93608e-12	63.8272
	0	-1.75333e-11	63.9102
	0	-9.8152e-12	63.9941
	0	-1.03605e-11	64.0772
	0	-6.83704e-12	64.1611
	0	-4.01443e-11	64.2441
	0	-7.42428e-12	64.3281
	0	-1.8624e-11	64.4121
	0	7.13094e-12	64.4951
	0	-1.32548e-11	64.5791
	0	-3.01997e-12	64.6621
	0	-2.06796e-11	64.7461
	0	-1.60232e-11	64.8291
	0	-1.19125e-11	64.9131
	0	-7.59207e-12	64.9961
	0	1.17464e-12	65.0801
	0	-8.85044e-12	65.1641
	-0.1	-1.14881e-08	65.2471
	0	9.60322e-09	65.3311
	0	1.03439e-09	65.4141
	0	4.13503e-10	65.4981
	0	2.00669e-10	65.5811
	0	1.48321e-10	65.665
	0	7.05531e-11	65.7481
	0	4.84476e-11	65.832
	0	4.72312e-11	65.916
	0	4.76926e-11	65.999
	0	2.16443e-11	66.083
	0	2.3491e-12	66.166
	0	2.51812e-13	66.25
	0	1.64429e-11	66.333
	0	1.71992e-12	66.417
	0	1.49748e-11	66.5
	0	-4.78169e-12	66.584
	0	-1.3045e-11	66.667
	0	7.13221e-13	66.751
	0	-2.04698e-11	66.835
	0	1.36325e-11	66.918
	0	2.64274e-12	67.0019
	0	1.04879e-12	67.085
	0	-1.8624e-11	67.1689
	0	-1.46809e-11	67.2519
	0	-1.09058e-11	67.3359
	0	-1.0738e-11	67.4189
	0	-7.38234e-12	67.5029
	0	-1.00669e-11	67.5859
	0	-2.12249e-11	67.6699
	0	-1.20383e-11	67.7539
	0	-2.50424e-11	67.8369
	0	-1.97132e-12	67.9209
	0	-1.08219e-11	68.0039
	0	-1.14511e-11	68.0879
	0	-2.66784e-11	68.1709
	0	-1.77011e-11	68.2549
	0	-3.69981e-11	68.3379
	0	4.19588e-13	68.4219
	0	-1.59812e-11	68.5059
	0	-4.90753e-12	68.5898

## Sheet: size
spike	V	I	T
size	0	5.03434e-13	0
test	0	-1.30023e-12	0.0830078
effect	0	-3.64527e-11	0.166992
	0	-9.81522e-12	0.25
	0	-2.26512e-11	0.333984
	0	-9.81522e-12	0.416992
	0	-1.60651e-11	0.500977
	0	-7.71793e-12	0.583984
	0	-3.13348e-11	0.667969
	0	-7.42431e-12	0.751953
	0	-2.24834e-11	0.834961
	0	-9.31187e-12	0.918945
	0	-1.01927e-11	1.00195
	0	-1.3884e-11	1.08594
	0	-1.7785e-11	1.16894
	0	-1.85821e-11	1.25293
	0	-6.75318e-12	1.33594
	0	-2.89437e-11	1.41992
	0	-1.34645e-11	1.50293
	0	-3.67044e-11	1.58691
	0	-4.44616e-12	1.6709
	0	-2.5336e-11	1.75391
	0	-9.22732e-13	1.83789
	0	-1.87079e-11	1.9209
	0	-2.42453e-11	2.00488
	0	-3.40615e-11	2.08789
	0	-1.84143e-11	2.17188
	0	-8.09545e-12	2.25488
	0	-2.30707e-11	2.33887
	0	-1.96308e-11	2.42188
	0	-2.81886e-11	2.50586
	0	-1.84982e-11	2.58984
	0	-2.79369e-11	2.67285
	0	-3.27168e-12	2.75684
	0	-9.68938e-12	2.83984
	0	-2.5336e-11	2.92383
	0	-3.41454e-11	3.00684
	0	-2.87339e-11	3.09082
	0	-1.88748e-12	3.17383
	0	-2.18542e-11	3.25781
	0	-2.42872e-11	3.34082
	0.02	2.17468e-09	3.42481
	0.12	1.24887e-08	3.50879
	0	-1.06433e-08	3.5918
	0	-1.27867e-09	3.67578
	0	-5.5449e-10	3.75879
	0	-3.36477e-10	3.84277
	0	-2.21283e-10	3.92578
	0	-1.48291e-10	4.00977
	0	-9.47628e-11	4.09277
	0	-1.076e-10	4.17676
	0	-6.63628e-11	4.25977
	0	-8.13389e-11	4.34375
	0	-6.46849e-11	4.42773
	0	-5.85182e-11	4.51074
	0	-3.71658e-11	4.59473
	0	-3.02022e-11	4.67773
	0	-5.05058e-11	4.76172
	0	-3.67883e-11	4.84473
	0	-2.85242e-11	4.92871
	0	-1.48487e-11	5.01172
	0	-2.98666e-11	5.0957
	0	-2.74754e-11	5.17871
	0	-3.4481e-11	5.26269
	0	-1.97567e-11	5.3457
	0	-4.50524e-11	5.42969
	0	-1.78689e-11	5.51367
	0	-2.16864e-11	5.59668
	0	-4.37519e-11	5.68066
	0	-2.70559e-11	5.76367
	0	-3.06636e-11	5.84766
	0	-1.22481e-11	5.93066
	0	-2.35741e-11	6.01465
	0	-2.06376e-11	6.09766
	0	-5.13448e-11	6.18164
	0	-3.60751e-11	6.26465
	0	-2.67623e-11	6.34863
	0	-1.36323e-11	6.43164
	0	-1.02766e-11	6.51562
	0	-2.71398e-11	6.59961
	0	-4.24515e-11	6.68262
	0	-2.42453e-11	6.7666
	0	-7.17264e-12	6.84961
	0.12	1.48401e-08	6.93359
	0.02	-8.07596e-09	7.0166
	0	-2.87234e-09	7.10059
	0	-6.9175e-10	7.18359
	0	-3.60641e-10	7.26758
	0	-2.60045e-10	7.35059
	0	-1.58904e-10	7.43457
	0	-1.40824e-10	7.51758
	0	-1.1578e-10	7.60156
	0	-9.45531e-11	7.68457
	0	-5.91055e-11	7.76856
	0	-6.85023e-11	7.85254
	0	-5.09253e-11	7.93555
	0	-6.68663e-11	8.01953
	0	-4.56397e-11	8.10254
	0	-4.6227e-11	8.18652
	0	-3.11251e-11	8.26953
	0	-4.01023e-11	8.35352
	0	-5.73017e-11	8.43652
	0	-3.46488e-11	8.52051
	0	-4.39197e-11	8.60352
	0	-1.58973e-11	8.6875
	0	-2.78949e-11	8.77148
	0	-1.4597e-11	8.85449
	0	-4.83664e-11	8.93848
	0	-4.27871e-11	9.02148
	0	-1.20383e-11	9.10547
	0	-3.22997e-11	9.18848
	0	-2.06796e-11	9.27246
	0	-3.59912e-11	9.35547
	0	-1.96728e-11	9.43945
	0	-4.34583e-11	9.52344
	0	-2.88178e-11	9.60645
	0	-3.82565e-11	9.69043
	0	-2.50004e-11	9.77344
	0	-4.13189e-11	9.85742
	0	-1.34226e-11	9.94043
	0	-1.68202e-11	10.0244
	0	-2.66364e-11	10.1074
	0	-2.00084e-11	10.1914
	0	-3.37259e-11	10.2754
	0	-1.95889e-11	10.3584
	-0.02	-2.18877e-09	10.4424
	-0.12	-1.18824e-08	10.5264
	0	1.20454e-08	10.6094
	0	1.32922e-09	10.6934
	0	5.13122e-10	10.7764
	0	2.74745e-10	10.8604
	0	1.81331e-10	10.9443
	0	1.12918e-10	11.0273
	0	7.8103e-11	11.1113
	0	3.06624e-11	11.1943
	0	4.24491e-11	11.2783
	0	1.34647e-11	11.3613
	0	2.96138e-11	11.4453
	0	5.53691e-12	11.5283
	0	6.29194e-12	11.6123
	0	1.46818e-12	11.6963
	0	-1.36323e-11	11.7793
	0	2.10568e-11	11.8633
	0	-3.77504e-12	11.9463
	0	-6.92097e-12	12.0303
	0	-5.70454e-12	12.1133
	0	-1.00669e-11	12.1973
	0	-1.36742e-11	12.2803
	0	-7.25654e-12	12.3643
	0	-7.92767e-12	12.4482
	0	-2.84822e-11	12.5312
	0	-2.44131e-11	12.6152
	0	-2.74754e-11	12.6982
	0	-3.14585e-12	12.7822
	0	-2.51682e-11	12.8652
	0	-1.15769e-11	12.9492
	0	-1.91694e-11	13.0322
	0	-3.54459e-11	13.1162
	0	-2.13916e-12	13.1992
	0	-1.09478e-11	13.2832
	0	-4.53006e-12	13.3672
	0	-3.04119e-11	13.4502
	0	-1.63581e-12	13.5342
	0	-3.89277e-11	13.6172
	0	-5.95622e-12	13.7012
	0	-1.21642e-11	13.7842
	0	-2.58813e-11	13.8682
	-0.12	-1.37523e-08	13.9512
	-0.02	8.96015e-09	14.0352
	0	2.9302e-09	14.1191
	0	6.97348e-10	14.2021
	0	3.43158e-10	14.2861
	0	1.70216e-10	14.3691
	0	1.37498e-10	14.4531
	0	5.6417e-11	14.5361
	0	8.30945e-11	14.6201
	0	6.53515e-11	14.7031
	0	2.80199e-11	14.7871
	0	3.18788e-11	14.8711
	0	1.06543e-11	14.9541
	0	2.16021e-11	15.0381
	0	1.02768e-11	15.1211
	0	1.6779e-12	15.2051
	0	-1.7197e-12	15.2881
	0	-7.84377e-12	15.3721
	0	4.36243e-12	15.4551
	0	-1.63581e-12	15.5391
	0	-1.62329e-11	15.6221
	0	-1.74075e-11	15.706
	0	-1.48068e-11	15.79
	0	-1.38001e-11	15.873
	0	4.48825e-12	15.957
	0	-1.27095e-11	16.04
	0	-1.91274e-11	16.124
	0	-3.90955e-11	16.207
	0	-2.73496e-11	16.291
	0	-1.02766e-11	16.374
	0	-9.39577e-12	16.458
	0	-1.58554e-11	16.542
	0	-2.51262e-11	16.625
	0	-1.43873e-11	16.709
	0	-1.34226e-11	16.792
	0	5.41107e-12	16.876
	0	-2.33644e-11	16.959
	0	-1.6988e-11	17.043
	0	-1.38001e-11	17.126
	0	-2.2861e-11	17.21
	0	-1.04444e-11	17.293
	0	-6.71055e-13	17.377
	0.04	4.43345e-09	17.4609
	0.12	1.03041e-08	17.5449
	0	-1.08583e-08	17.6279
	0	-1.36492e-09	17.7119
	0	-5.69759e-10	17.7949
	0	-3.28381e-10	17.8789
	0	-2.64156e-10	17.9619
	0	-1.62679e-10	18.0459
	0	-1.26309e-10	18.1289
	0	-7.82346e-11	18.2129
	0	-8.54499e-11	18.2969
	0	-6.35522e-11	18.3799
	0	-6.94252e-11	18.4639
	0	-7.14806e-11	18.5469
	0	-5.32745e-11	18.6309
	0	-2.9531e-11	18.7139
	0	-3.84662e-11	18.7979
	0	-6.90896e-11	18.8809
	0	-4.91215e-11	18.9648
	0	-4.27032e-11	19.0479
	0	-2.23575e-11	19.1318
	0	-3.01183e-11	19.2158
	0	-1.85401e-11	19.2988
	0	-4.21578e-11	19.3828
	0	-3.25094e-11	19.4658
	0	-2.06376e-11	19.5498
	0	-2.90276e-11	19.6328
	0	-1.16189e-11	19.7168
	0	-3.66624e-11	19.7998
	0	-3.30128e-11	19.8838
	0	-4.01023e-11	19.9678
	0	-2.46648e-11	20.0508
	0	-5.99816e-12	20.1348
	0	-2.58813e-11	20.2178
	0	-3.41035e-11	20.3018
	0	-2.13088e-11	20.3848
	0	-3.6492e-12	20.4688
	0	-1.06961e-11	20.5518
	0	-2.24414e-11	20.6357
	0	-4.04798e-11	20.7197
	0	-3.73336e-11	20.8027
	0	-1.5394e-11	20.8867
	0.12	1.48589e-08	20.9697
	0.04	-5.7573e-09	21.0537
	0	-4.61842e-09	21.1367
	0	-8.89249e-10	21.2207
	0	-4.59097e-10	21.3037
	0	-2.57528e-10	21.3877
	0	-1.94981e-10	21.4707
	0	-1.35412e-10	21.5547
	0	-1.06005e-10	21.6387
	0	-1.03488e-10	21.7217
	0	-5.98606e-11	21.8057
	0	-5.72597e-11	21.8887
	0	-6.25454e-11	21.9727
	0	-6.53141e-11	22.0557
	0	-5.25194e-11	22.1396
	0	-5.01702e-11	22.2227
	0	-3.74175e-11	22.3066
	0	-5.94411e-11	22.3896
	0	-4.15286e-11	22.4736
	0	-4.37939e-11	22.5576
	0	-4.42973e-11	22.6406
	0	-3.32645e-11	22.7246
	0	-2.00084e-11	22.8076
	0	-3.04119e-11	22.8916
	0	-3.12509e-11	22.9746
	0	-3.75433e-11	23.0586
	0	-2.79369e-11	23.1416
	0	-4.49685e-11	23.2256
	0	-1.24159e-11	23.3086
	0	-5.26872e-11	23.3926
	0	-1.84982e-11	23.4756
	0	-3.77951e-11	23.5596
	0	-2.06376e-11	23.6436
	0	-2.86081e-11	23.7266
	0	-6.45956e-12	23.8105
	0	-3.71658e-11	23.8936
	0	-1.80367e-11	23.9775
	0	-1.50584e-11	24.0605
	0	-2.96988e-11	24.1445
	0	-9.01825e-12	24.2275
	0	-3.0328e-11	24.3115
	0	-1.9505e-11	24.3945
	-0.04	-4.43094e-09	24.4795
	-0.12	-1.00435e-08	24.5625
	0	1.22297e-08	24.6465
	0	1.40392e-09	24.7295
	0	5.54229e-10	24.8135
	0	3.0482e-10	24.8965
	0	2.0696e-10	24.9805
	0	1.23656e-10	25.0635
	0	1.15141e-10	25.1475
	0	3.82126e-11	25.2305
	0	4.60984e-11	25.3145
	0	4.39173e-11	25.3984
	0	4.06036e-11	25.4814
	0	2.87329e-11	25.5654
	0	5.9983e-12	25.6484
	0	2.13505e-11	25.7324
	0	-1.8666e-11	25.8154
	0	1.18707e-11	25.8994
	0	1.51012e-12	25.9824
	0	-2.73076e-11	26.0664
	0	-1.85401e-11	26.1504
	0	-6.04011e-12	26.2334
	0	-7.80183e-12	26.3174
	0	-1.39678e-11	26.4004
	0	-9.56355e-12	26.4844
	0	-2.27351e-11	26.5674
	0	2.3071e-12	26.6514
	0	-1.7197e-12	26.7344
	0	-6.71053e-13	26.8184
	0	-1.58554e-11	26.9014
	0	-2.75593e-11	26.9854
	0	-2.96568e-11	27.0693
	0	-1.46809e-11	27.1523
	0	1.73237e-11	27.2363
	0	-6.41761e-12	27.3193
	0	-1.12414e-11	27.4033
	0	-3.12929e-11	27.4863
	0	-2.7014e-11	27.5703
	0	7.76004e-12	27.6533
	0	-3.93052e-11	27.7373
	0	2.51683e-12	27.8213
	0	-3.34323e-11	27.9043
	-0.12	-1.37648e-08	27.9883
	-0.04	6.29698e-09	28.0713
	0	4.6543e-09	28.1553
	0	9.17814e-10	28.2383
	0	3.99911e-10	28.3223
	0	2.29443e-10	28.4053
	0	1.49033e-10	28.4893
	0	1.19671e-10	28.5723
	0	9.2826e-11	28.6562
	0	5.86821e-11	28.7402
	0	2.72648e-11	28.8232
	0	6.1661e-12	28.9072
	0	2.93621e-11	28.9902
	0	3.49409e-11	29.0742
	0	2.42866e-11	29.1572
	0	-9.14409e-12	29.2412
	0	1.44294e-11	29.3242
	0	-1.14092e-11	29.4082
	0	1.73236e-11	29.4912
	0	-8.97631e-12	29.5752
	0	-2.13088e-11	29.6592
	0	-8.85047e-12	29.7422
	0	-1.60232e-11	29.8262
	0	1.75753e-11	29.9092
	0	-1.36323e-11	29.9932
	0	-5.28509e-12	30.0762
	0	-3.02441e-11	30.1602
	0	-2.5294e-11	30.2432
	0	2.81043e-12	30.3271
	0	5.03424e-13	30.4111
	0	-2.50843e-11	30.4941
	0	-2.23995e-11	30.5781
	0	-9.06019e-12	30.6611
	0	-4.5388e-11	30.7451
	0	1.03187e-11	30.8281
	0	-1.63588e-11	30.9121
	0	-5.62064e-12	30.9951
	0	-4.48426e-11	31.0791
	0	-3.41035e-11	31.1631
	0	-3.31363e-12	31.2461
	0	-2.14766e-11	31.3301
	0	1.09066e-12	31.4131
	0.06	6.76631e-09	31.4971
	0.12	8.31053e-09	31.5811
	0	-1.1047e-08	31.6641
	0	-1.43225e-09	31.748
	0	-6.34153e-10	31.8311
	0	-3.80566e-10	31.915
	0	-2.61765e-10	31.999
	0	-1.74635e-10	32.082
	0	-1.24799e-10	32.166
	0	-1.0869e-10	32.249
	0	-7.39138e-11	32.333
	0	-1.01685e-10	32.416
	0	-6.51882e-11	32.5
	0	-5.80987e-11	32.583
	0	-5.533e-11	32.667
	0	-3.34742e-11	32.751
	0	-6.6237e-11	32.834
	0	-4.79469e-11	32.918
	0	-4.96668e-11	33.001
	0	-2.68042e-11	33.085
	0	-2.05118e-11	33.168
	0	-4.21159e-11	33.252
	0	-5.13029e-11	33.335
	0	-5.65046e-11	33.419
	0	-2.72639e-12	33.502
	0	-2.35321e-11	33.5859
	0	-1.76172e-11	33.6699
	0	-4.09832e-11	33.7529
	0	-2.42872e-11	33.8369
	0	-2.12669e-11	33.9199
	0	-1.54779e-11	34.0039
	0	-2.16025e-11	34.0869
	0	-3.59912e-11	34.1709
	0	-2.0302e-11	34.2539
	0	-1.91274e-11	34.3379
	0	-8.43102e-12	34.4219
	0	-3.32225e-11	34.5049
	0	-1.76592e-11	34.5889
	0	-4.15705e-11	34.6719
	0	-3.97667e-11	34.7559
	0	-7.5921e-12	34.8389
	0	-2.17703e-11	34.9228
	0.12	1.48771e-08	35.0059
	0.06	-3.45154e-09	35.0898
	0	-6.379e-09	35.1738
	0	-1.09719e-09	35.2568
	0	-5.25167e-10	35.3408
	0	-3.21585e-10	35.4238
	0	-2.40328e-10	35.5078
	0	-1.66245e-10	35.5908
	0	-1.30252e-10	35.6748
	0	-9.89998e-11	35.7578
	0	-8.83445e-11	35.8418
	0	-6.64048e-11	35.9248
	0	-7.69342e-11	36.0088
	0	-5.74275e-11	36.0928
	0	-5.52461e-11	36.1758
	0	-5.7008e-11	36.2598
	0	-3.33064e-11	36.3428
	0	-5.79729e-11	36.4268
	0	-3.96828e-11	36.5098
	0	-5.82246e-11	36.5938
	0	-2.79369e-11	36.6768
	0	-3.26772e-11	36.7607
	0	-2.52101e-11	36.8447
	0	-4.03121e-11	36.9277
	0	-2.17703e-11	37.0117
	0	-1.84562e-11	37.0947
	0	-3.00763e-11	37.1787
	0	-5.74649e-12	37.2617
	0	-5.59174e-11	37.3457
	0	-1.95889e-11	37.4287
	0	-4.15286e-11	37.5127
	0	-2.40775e-11	37.5967
	0	-3.30548e-11	37.6797
	0	-3.89277e-11	37.7637
	0	-2.06796e-11	37.8467
	0	-4.12769e-11	37.9307
	0	-3.39752e-12	38.0137
	0	-2.90695e-11	38.0977
	0	-2.67623e-11	38.1807
	0	-3.57815e-11	38.2647
	0	-2.80208e-11	38.3477
	0	-1.08219e-11	38.4316
	-0.06	-6.73226e-09	38.5156
	-0.12	-8.24908e-09	38.5996
	0	1.24134e-08	38.6826
	0	1.50073e-09	38.7666
	0	6.09136e-10	38.8496
	0	3.35188e-10	38.9336
	0	2.18789e-10	39.0166
	0	1.46349e-10	39.1006
	0	9.6685e-11	39.1836
	0	6.43868e-11	39.2676
	0	6.93783e-11	39.3516
	0	2.34897e-11	39.4346
	0	4.26169e-11	39.5185
	0	6.08224e-12	39.6016
	0	1.7827e-11	39.6855
	0	9.56371e-12	39.7685
	0	1.71139e-11	39.8525
	0	5.32719e-12	39.9355
	0	-1.60651e-11	40.0195
	0	-7.46626e-12	40.1035
	0	-5.15924e-12	40.1865
	0	1.02348e-11	40.2705
	0	-1.39678e-11	40.3535
	0	1.34234e-12	40.4375
	0	-2.34483e-11	40.5205
	0	-8.26323e-12	40.6045
	0	-1.67704e-13	40.6875
	0	-1.81206e-11	40.7715
	0	-5.03266e-13	40.8555
	0	-1.27095e-11	40.9385
	0	2.81045e-12	41.0225
	0	-1.35484e-11	41.1055
	0	8.30535e-12	41.1895
	0	-2.95729e-11	41.2725
	0	-4.81567e-11	41.3565
	0	-2.44131e-11	41.4395
	0	-3.71658e-11	41.5234
	0	6.7114e-12	41.6074
	0	-3.18802e-11	41.6904
	0	-4.90756e-12	41.7744
	0	-1.57715e-11	41.8574
	0	-2.08893e-11	41.9414
	-0.12	-1.3755e-08	42.0244
	-0.06	3.82923e-09	42.1084
	0	6.49702e-09	42.1914
	0	1.10624e-09	42.2754
	0	4.92988e-10	42.3594
	0	2.93159e-10	42.4424
	0	2.11868e-10	42.5264
	0	1.16316e-10	42.6094
	0	1.1426e-10	42.6934
	0	6.14506e-11	42.7764
	0	4.86991e-11	42.8603
	0	4.29106e-11	42.9434
	0	3.50248e-11	43.0273
	0	1.45972e-11	43.1113
	0	-2.85223e-12	43.1943
	0	-3.02002e-12	43.2783
	0	6.75336e-12	43.3613
	0	-1.51423e-11	43.4453
	0	5.20135e-12	43.5283
	0	1.88764e-12	43.6123
	0	-5.49481e-12	43.6953
	0	-1.50997e-12	43.7793
	0	3.77519e-12	43.8633
	0	-1.41776e-11	43.9463
	0	-2.97806e-12	44.0303
	0	-2.75174e-11	44.1133
	0	1.29194e-11	44.1973
	0	-1.30024e-12	44.2803
	0	-6.33372e-12	44.3643
	0	-1.09058e-11	44.4473
	0	-4.15705e-11	44.5312
	0	-2.0302e-11	44.6143
	0	-2.55038e-11	44.6982
	0	-1.05702e-11	44.7822
	0	-3.27169e-12	44.8652
	0	-1.98406e-11	44.9492
	0	-2.6133e-11	45.0322
	0	-2.42453e-11	45.1162
	0	-1.9463e-11	45.1992
	0	-9.47966e-12	45.2832
	0	8.89256e-12	45.3662
	0	1.00677e-12	45.4502
	0.08	9.28431e-09	45.5342
	0.12	6.51975e-09	45.6182
	0	-1.11458e-08	45.7012
	0	-1.63935e-09	45.7852
	0	-7.12724e-10	45.8682
	0	-4.14e-10	45.9522
	0	-2.80516e-10	46.0352
	0	-1.95358e-10	46.1191
	0	-1.57352e-10	46.2022
	0	-5.29809e-11	46.2861
	0	5.89758e-11	46.3691
	0	4.61404e-11	46.4531
	0	-1.59785e-10	46.5361
	0	-7.68503e-11	46.6201
	0	-5.58334e-11	46.7041
	0	-3.07894e-11	46.7871
	0	-1.42615e-11	46.8711
	0	-4.30807e-11	46.9541
	0	-2.36999e-11	47.0381
	0	-2.68445e-12	47.1211
	0	2.55617e-10	47.2051
	0	-8.05418e-11	47.2881
	0	-1.63183e-10	47.3721
	0	-8.51983e-11	47.456
	0	-3.9557e-11	47.5391
	0	-1.90855e-11	47.623
	0	-4.33324e-11	47.706
	0	-2.76432e-11	47.79
	0	-3.23416e-11	47.873
	0	-2.13508e-11	47.957
	0	-2.37419e-11	48.04
	0	-2.29029e-11	48.124
	0	-1.96728e-11	48.207
	0	-2.43292e-11	48.291
	0	-2.22737e-11	48.375
	0	-2.7853e-11	48.458
	0	-1.80367e-11	48.542
	0	-2.24834e-11	48.625
	0	-7.1307e-12	48.709
	0	-4.44231e-11	48.792
	0	-2.96149e-11	48.876
	0	-1.89177e-11	48.959
	0.12	1.48334e-08	49.043
	0.08	-1.2209e-09	49.126
	0	-8.17051e-09	49.21
	0	-1.27355e-09	49.294
	0	-6.19512e-10	49.377
	0	-3.62528e-10	49.4609
	0	-2.57528e-10	49.544
	0	-1.89821e-10	49.6279
	0	-1.52234e-10	49.7109
	0	-1.19471e-10	49.7949
	0	-7.91575e-11	49.8779
	0	-1.04663e-10	49.9619
	0	-8.94772e-11	50.0459
	0	-6.78311e-11	50.1289
	0	-3.15446e-11	50.2129
	0	-4.96249e-11	50.2959
	0	-4.24515e-11	50.3799
	0	-5.73437e-11	50.4629
	0	-6.01962e-11	50.5469
	0	-2.92373e-11	50.6299
	0	-2.41194e-11	50.7139
	0	-2.65525e-11	50.7969
	0	-7.60532e-11	50.8809
	0	-2.29029e-11	50.9648
	0	-4.52202e-11	51.0478
	0	-2.73076e-11	51.1318
	0	-2.83144e-11	51.2148
	0	-4.40036e-11	51.2988
	0	-4.29129e-11	51.3818
	0	-1.80787e-11	51.4658
	0	-1.16189e-11	51.5488
	0	-3.40615e-11	51.6328
	0	-1.27934e-11	51.7168
	0	-2.83983e-11	51.7998
	0	-2.58394e-11	51.8838
	0	-3.44391e-11	51.9668
	0	-2.23995e-11	52.0508
	0	-5.8716e-13	52.1338
	0	-4.31227e-11	52.2178
	0	-4.35422e-11	52.3008
	0	-3.82985e-11	52.3848
	0	6.83722e-12	52.4678
	-0.08	-9.05426e-09	52.5527
	-0.12	-6.44629e-09	52.6357
	0	1.26336e-08	52.7197
	0	1.58337e-09	52.8027
	0	6.63875e-10	52.8867
	0	3.69961e-10	52.9697
	0	2.32925e-10	53.0537
	0	1.44587e-10	53.1367
	0	1.07885e-10	53.2207
	0	7.96969e-11	53.3037
	0	6.69035e-11	53.3877
	0	4.45464e-11	53.4717
	0	1.45553e-11	53.5547
	0	3.69962e-11	53.6387
	0	-4.27839e-12	53.7217
	0	1.92951e-11	53.8057
	0	-2.05527e-12	53.8887
	0	2.96557e-11	53.9727
	0	-2.30287e-11	54.0557
	0	-1.08639e-11	54.1397
	0	1.03607e-11	54.2236
	0	1.34234e-12	54.3066
	0	-3.35489e-13	54.3906
	0	-2.99924e-11	54.4736
	0	-9.22724e-13	54.5576
	0	-2.17283e-11	54.6406
	0	-4.94952e-12	54.7246
	0	-4.1106e-12	54.8076
	0	-2.23575e-11	54.8916
	0	-2.02601e-11	54.9756
	0	-1.43034e-11	55.0586
	0	-2.21478e-11	55.1426
	0	-1.09058e-11	55.2256
	0	-1.84143e-11	55.3096
	0	-3.41035e-11	55.3926
	0	-1.82884e-11	55.4766
	0	-2.96988e-11	55.5596
	0	-1.3422e-12	55.6435
	0	-1.08639e-11	55.7275
	0	-4.06896e-11	55.8105
	0	-1.44712e-11	55.8945
	0	-3.037e-11	55.9775
	-0.12	-1.37479e-08	56.0615
	-0.08	1.43643e-09	56.1445
	0	8.48675e-09	56.2285
	0	1.30984e-09	56.3115
	0	5.65974e-10	56.3955
	0	3.41061e-10	56.4785
	0	2.16146e-10	56.5625
	0	1.54276e-10	56.6465
	0	9.91597e-11	56.7295
	0	7.91936e-11	56.8135
	0	4.85732e-11	56.8965
	0	6.70293e-11	56.9805
	0	2.67195e-11	57.0635
	0	1.19546e-11	57.1475
	0	-1.25754e-13	57.2305
	0	9.85731e-12	57.3145
	0	3.28855e-11	57.3984
	0	-2.93536e-13	57.4815
	0	1.80787e-11	57.5654
	0	-1.84562e-11	57.6484
	0	-4.90757e-12	57.7324
	0	1.82884e-11	57.8154
	0	-2.21059e-11	57.8994
	0	-2.76834e-12	57.9824
	0	-2.66364e-11	58.0664
	0	-5.8716e-13	58.1504
	0	-1.36323e-11	58.2334
	0	3.77518e-12	58.3174
	0	1.10318e-11	58.4004
	0	-2.58813e-11	58.4844
	0	-2.01342e-11	58.5674
	0	-1.45131e-11	58.6514
	0	-6.08205e-12	58.7344
	0	-5.70454e-12	58.8184
	0	-1.44712e-11	58.9023
	0	-3.80048e-11	58.9853
	0	-6.124e-12	59.0693
	0	-8.72464e-12	59.1523
	0	8.76674e-12	59.2363
	0	-6.124e-12	59.3193
	0	-3.26772e-11	59.4033
	0	-2.88178e-11	59.4863
	0.1	1.19698e-08	59.5713
	0.12	4.81298e-09	59.6543
	0	-1.14635e-08	59.7383
	0	-1.62597e-09	59.8213
	0	-7.33154e-10	59.9053
	0	-4.33423e-10	59.9883
	0	-2.6273e-10	60.0723
	0	-2.07985e-10	60.1553
	0	-1.51437e-10	60.2393
	0	-1.49004e-10	60.3223
	0	-1.03908e-10	60.4062
	0	-9.48467e-11	60.4893
	0	-6.41815e-11	60.5732
	0	-6.05318e-11	60.6572
	0	-7.38299e-11	60.7402
	0	-5.75953e-11	60.8242
	0	-5.93992e-11	60.9072
	0	-1.49746e-11	60.9912
	0	-4.69821e-11	61.0742
	0	-2.53779e-11	61.1582
	0	-5.13448e-11	61.2412
	0	-5.57495e-11	61.3252
	0	-1.58973e-11	61.4082
	0	-4.01862e-11	61.4922
	0	-1.39259e-11	61.5762
	0	-4.2032e-11	61.6592
	0	-1.91694e-11	61.7432
	0	-3.6998e-11	61.8262
	0	-1.82884e-11	61.9102
	0	-1.6149e-11	61.9932
	0	-4.88278e-11	62.0772
	0	-3.1125e-11	62.1602
	0	-4.77371e-11	62.2441
	0	7.25668e-12	62.3281
	0	-2.09732e-11	62.4111
	0	-9.68938e-12	62.4951
	0	-2.9489e-11	62.5781
	0	-1.56457e-11	62.6621
	0	-1.06541e-11	62.7451
	0	-1.14511e-11	62.8291
	0	-1.2332e-11	62.9121
	0	-3.79209e-11	62.9961
	0.12	1.48419e-08	63.0801
	0.1	9.39501e-10	63.1631
	0	-9.94506e-09	63.2471
	0	-1.48808e-09	63.3301
	0	-7.0295e-10	63.4141
	0	-4.27298e-10	63.4971
	0	-2.99058e-10	63.581
	0	-1.94351e-10	63.6641
	0	-1.65784e-10	63.748
	0	-1.31217e-10	63.831
	0	-1.10158e-10	63.915
	0	-1.00216e-10	63.999
	0	-7.99965e-11	64.082
	0	-6.04479e-11	64.166
	0	-5.92733e-11	64.249
	0	-7.86541e-11	64.333
	0	-5.4533e-11	64.416
	0	-6.59014e-11	64.5
	0	-3.00763e-11	64.583
	0	-3.15026e-11	64.667
	0	-3.18802e-11	64.75
	0	-5.54139e-11	64.834
	0	-4.73177e-11	64.918
	0	-1.24578e-11	65.001
	0	-2.3616e-11	65.085
	0	-3.33484e-11	65.168
	0	-6.18323e-11	65.2519
	0	-4.21578e-11	65.335
	0	-4.22418e-11	65.4189
	0	-1.99245e-11	65.5019
	0	-1.70299e-11	65.5859
	0	-5.26872e-11	65.6699
	0	-3.0328e-11	65.7529
	0	-2.78949e-11	65.8369
	0	-1.17028e-11	65.9199
	0	-2.46648e-11	66.0039
	0	-1.47229e-11	66.0869
	0	-4.68143e-11	66.1709
	0	-2.27771e-11	66.2539
	0	-2.76432e-11	66.3379
	0	-2.2022e-11	66.4219
	0	-2.51665e-12	66.5049
	-0.1	-1.14531e-08	66.5889
	-0.12	-4.70282e-09	66.6728
	0	1.28773e-08	66.7559
	0	1.66525e-09	66.8398
	0	6.89756e-10	66.9238
	0	3.78644e-10	67.0068
	0	2.35483e-10	67.0908
	0	1.6514e-10	67.1738
	0	1.37037e-10	67.2578
	0	9.75239e-11	67.3408
	0	6.4219e-11	67.4248
	0	3.52764e-11	67.5078
	0	3.7164e-11	67.5918
	0	2.7139e-11	67.6748
	0	3.81707e-11	67.7588
	0	2.84812e-11	67.8428
	0	-4.23643e-12	67.9258
	0	1.73656e-11	68.0098
	0	-2.13927e-11	68.0928
	0	9.43787e-12	68.1768
	0	2.64266e-12	68.2598
	0	-1.83723e-11	68.3438
	0	-2.32805e-11	68.4268
	0	-1.88338e-11	68.5107
	0	1.92959e-12	68.5938
	0	-1.39259e-11	68.6777
	0	-2.89418e-12	68.7617
	0	-2.0344e-11	68.8447
	0	-2.26512e-11	68.9287
	0	-1.95889e-11	69.0117
	0	-6.92097e-12	69.0957
	0	-1.16608e-11	69.1787
	0	-2.79788e-11	69.2627
	0	-1.92533e-11	69.3457
	0	-2.2819e-11	69.4297
	0	1.92958e-12	69.5127
	0	-2.27771e-11	69.5967
	0	-7.84377e-12	69.6807
	0	-4.7863e-11	69.7637
	0	-3.51522e-11	69.8477
	0	7.802e-12	69.9307
	0	-9.94105e-12	70.0147
	-0.12	-1.37891e-08	70.0977
	-0.1	-8.17347e-10	70.1816
	0	1.06767e-08	70.2647
	0	1.53794e-09	70.3486
	0	6.85855e-10	70.4326
	0	3.82755e-10	70.5156
	0	2.3368e-10	70.5996
	0	1.57926e-10	70.6826
	0	1.10569e-10	70.7666
	0	9.87404e-11	70.8496
	0	8.8254e-11	70.9336
	0	7.42861e-11	71.0166
	0	3.41019e-11	71.1006
	0	3.61573e-11	71.1836
	0	3.44376e-11	71.2676
	0	1.60653e-11	71.3506
	0	2.29444e-11	71.4346
	0	-2.26498e-12	71.5186
	0	8.34728e-12	71.6016
	0	3.18796e-12	71.6856
	0	1.93371e-11	71.7686
	0	3.60742e-12	71.8525
	0	-1.35064e-11	71.9356
	0	-1.43873e-11	72.0195
	0	-2.66364e-11	72.1025
	0	1.27096e-11	72.1865
	0	-2.00503e-11	72.2705
	0	1.51013e-12	72.3535
	0	-2.22317e-11	72.4375
	0	-1.88338e-11	72.5205
	0	-8.55685e-12	72.6045
	0	-1.04025e-11	72.6875
	0	-4.61394e-12	72.7715
	0	-4.68982e-11	72.8545
	0	-2.29448e-11	72.9385
	0	-2.30707e-11	73.0225
	0	-6.87901e-12	73.1055
	0	-1.87499e-11	73.1894
	0	-9.73133e-12	73.2725
	0	-3.59073e-11	73.3564
	0	-4.25354e-11	73.4394
	0	-7.12992e-13	73.5234
	0.12	1.48647e-08	73.6074
	0.12	3.1492e-09	73.6914
	0	-1.16983e-08	73.7744
	0	-1.69028e-09	73.8584
	0	-7.54591e-10	73.9414
	0	-4.57335e-10	74.0254
	0	-2.80768e-10	74.1084
	0	-2.47796e-10	74.1924
	0	-1.77026e-10	74.2754
	0	-1.4548e-10	74.3594
	0	-1.0697e-10	74.4424
	0	-9.43014e-11	74.5264
	0	-9.09874e-11	74.6094
	0	-8.89738e-11	74.6934
	0	-8.53661e-11	74.7773
	0	-2.83144e-11	74.8603
	0	-6.72857e-11	74.9443
	0	-3.17543e-11	75.0273
	0	-6.25874e-11	75.1113
	0	-4.92054e-11	75.1943
	0	-2.89017e-11	75.2783
	0	-3.88019e-11	75.3613
	0	-1.90855e-11	75.4453
	0	-4.94152e-11	75.5283
	0	-3.29289e-11	75.6123
	0	-5.2855e-11	75.6963
	0	-1.72397e-11	75.7793
	0	-2.52521e-11	75.8633
	0	-3.9557e-11	75.9463
	0	-4.61011e-11	76.0303
	0	-3.32645e-11	76.1133
	0	-2.01762e-11	76.1973
	0	-1.79528e-11	76.2803
	0	-1.67363e-11	76.3643
	0	-4.54299e-11	76.4473
	0	-3.3684e-11	76.5312
	0	-3.39776e-11	76.6152
	0	-1.48068e-11	76.6982
	0	-3.09573e-11	76.7822
	0	-3.93472e-11	76.8652
	0	-2.65106e-11	76.9492
	0	-4.15286e-11	77.0322
	0.12	1.49143e-08	77.1162
	0.12	3.12966e-09	77.1992
	0	-1.16883e-08	77.2832
	0	-1.70782e-09	77.3672
	0	-7.90122e-10	77.4502
	0	-4.4194e-10	77.5342
	0	-2.93521e-10	77.6172
	0	-2.04042e-10	77.7012
	0	-1.94435e-10	77.7842
	0	-1.44264e-10	77.8682
	0	-1.29665e-10	77.9512
	0	-8.15067e-11	78.0352
	0	-8.94352e-11	78.1182
	0	-1.01475e-10	78.2022
	0	-7.26134e-11	78.2852
	0	-6.81248e-11	78.3691
	0	-4.2074e-11	78.4531
	0	-6.42234e-11	78.5361
	0	-5.2058e-11	78.6201
	0	-6.67404e-11	78.7031
	0	-4.90796e-11	78.7871
	0	-2.58813e-11	78.8701
	0	-1.90855e-11	78.9541
	0	-2.24834e-11	79.0371
	0	-8.44851e-11	79.1211
	0	-4.63528e-11	79.2051
	0	-5.44911e-11	79.2881
	0	-2.53779e-11	79.3721
	0	-3.85502e-11	79.4551
	0	-5.61271e-11	79.5391
	0	-2.07215e-11	79.6221
	0	-4.42134e-11	79.7061
	0	-3.04119e-11	79.7891
	0	-1.76592e-11	79.8731
	0	-3.75434e-11	79.9561
	0	-3.56976e-11	80.04
	0	-2.92373e-11	80.124
	0	-2.5336e-11	80.207
	0	-3.60332e-11	80.291
	0	-2.67623e-11	80.374
	0	-4.06476e-11	80.458
	0	-3.45649e-11	80.541
	-0.12	-1.38234e-08	80.625
	-0.12	-3.00092e-09	80.709
	0	1.31052e-08	80.793
	0	1.7035e-09	80.876
	0	7.55149e-10	80.96
	0	3.9127e-10	81.043
	0	2.95382e-10	81.1269
	0	1.88295e-10	81.21
	0	1.53018e-10	81.2939
	0	9.19452e-11	81.3769
	0	7.15595e-11	81.4609
	0	6.59808e-11	81.5439
	0	4.84894e-11	81.6279
	0	4.53434e-11	81.7119
	0	7.97043e-13	81.7949
	0	-1.67773e-12	81.8789
	0	1.07382e-11	81.9619
	0	2.65937e-11	82.0459
	0	2.89435e-12	82.1289
	0	-6.20788e-12	82.2129
	0	-2.26512e-11	82.2959
	0	-2.198e-11	82.3799
	0	1.94629e-11	82.4629
	0	-4.94951e-12	82.5469
	0	1.94629e-11	82.6309
	0	-2.6972e-11	82.7139
	0	-1.97567e-11	82.7978
	0	-1.67685e-13	82.8809
	0	-8.34711e-12	82.9648
	0	-3.90088e-12	83.0478
	0	-3.32645e-11	83.1318
	0	-1.8624e-11	83.2148
	0	-1.9463e-11	83.2988
	0	-7.08875e-12	83.3828
	0	-1.50165e-11	83.4658
	0	-2.04698e-11	83.5498
	0	-2.99924e-11	83.6328
	0	-1.97986e-11	83.7168
	0	2.0981e-13	83.7998
	0	-1.32548e-11	83.8838
	0	-8.38132e-14	83.9668
	0	-3.10831e-11	84.0508
	-0.12	-1.3808e-08	84.1338
	0	1.18813e-08	84.2188

## Sheet: XOR
XOR	V	I	T
	0	-1.1535e-11	0
	0	1.67796e-12	0.0839844
	-0.1	-1.14886e-08	0.167969
	-0.1	-2.50948e-09	0.250977
	0	1.06116e-08	0.334961
	0	1.44701e-09	0.417969
	0	6.37744e-10	0.501953
	0	3.50458e-10	0.584961
	0	2.25543e-10	0.668945
	0	1.45301e-10	0.75293
	0	1.24831e-10	0.835938
	0	8.30109e-11	0.919922
	0	7.05111e-11	1.00293
	0	4.63922e-11	1.08691
	0	5.28099e-11	1.16992
	0	3.26759e-11	1.25391
	0	2.6384e-11	1.33691
	0	5.0346e-13	1.4209
	0	1.77013e-11	1.50391
	0	1.39261e-11	1.58789
	0	2.84394e-11	1.67188
	0	-7.3404e-12	1.75488
	0	-4.73975e-12	1.83887
	0	4.15276e-12	1.92188
	0	2.05547e-12	2.00586
	0	-3.35449e-13	2.08887
	0	-3.90084e-12	2.17285
	0	2.7266e-12	2.25586
	0	-3.56528e-12	2.33984
	0	-3.35445e-13	2.42285
	0	-5.87229e-12	2.50684
	0	-1.06122e-11	2.59082
	0	-2.15186e-11	2.67383
	0	-1.64007e-11	2.75781
	0	-1.41776e-11	2.84082
	0	-5.7884e-12	2.92481
	0	-1.40517e-11	3.00781
	0	-8.09543e-12	3.0918
	0	-2.97803e-12	3.17481
	0	4.44637e-12	3.25879
	0	-1.89177e-11	3.3418
	0	-1.75753e-11	3.42578
	0	-1.3087e-11	3.50977
	0	-1.38409e-12	3.59277
	-0.1	-1.15041e-08	3.67676
	0.1	2.68637e-08	3.76074
	0	-7.6243e-09	3.84375
	0	-5.36579e-10	3.92773
	0	-1.50598e-10	4.01172
	0	-9.24138e-11	4.09473
	0	-4.14867e-11	4.17871
	0	-1.63588e-11	4.26172
	0	-2.00503e-11	4.3457
	0	-1.38001e-11	4.42871
	0	-1.09897e-11	4.51269
	0	-3.00764e-11	4.5957
	0	-3.5404e-11	4.67969
	0	-1.23739e-11	4.76269
	0	4.86583e-12	4.84668
	0	-6.45954e-12	4.93066
	0	-1.42615e-11	5.01367
	0	-2.3069e-12	5.09766
	0	-1.18705e-11	5.18066
	0	-2.08474e-11	5.26465
	0	1.0948e-11	5.34766
	0	-5.53673e-12	5.43164
	0	-1.45551e-11	5.51465
	0	-1.65265e-11	5.59863
	0	-1.71977e-11	5.68164
	0	-1.71558e-11	5.76562
	0	-1.51423e-11	5.84961
	0	-2.51556e-13	5.93262
	0	-1.32548e-11	6.0166
	0	-5.24312e-12	6.09961
	0	1.13266e-12	6.18359
	0	1.07802e-11	6.2666
	0	-1.06961e-11	6.35059
	0	-6.20787e-12	6.43359
	0	-3.3684e-11	6.51758
	0	-1.21631e-12	6.60059
	0	-3.5404e-11	6.68457
	0	5.87364e-13	6.76856
	0	1.67897e-13	6.85156
	0	-2.05118e-11	6.93555
	0	-1.59393e-11	7.01856
	0	2.72658e-12	7.10254
	0.1	1.21069e-08	7.18555
	-0.1	-2.1242e-08	7.26953
	0	8.60297e-09	7.35352
	0	6.53223e-10	7.4375
	0	1.62121e-10	7.52051
	0	7.23986e-11	7.60449
	0	2.63002e-11	7.6875
	0	1.70301e-11	7.77148
	0	1.54781e-11	7.85449
	0	-1.42195e-11	7.93848
	0	8.26347e-12	8.02148
	0	-1.29192e-11	8.10547
	0	1.67904e-13	8.18945
	0	-1.01927e-11	8.27246
	0	-3.85889e-12	8.35645
	0	-4.08155e-11	8.43945
	0	-2.57555e-11	8.52344
	0	-1.29611e-11	8.60645
	0	-2.30689e-12	8.69043
	0	-2.81025e-12	8.77344
	0	-3.77382e-13	8.85742
	0	1.14492e-16	8.94141
	0	-6.7951e-12	9.02441
	0	-2.40356e-11	9.1084
	0	-9.22796e-12	9.19141
	0	-2.57975e-11	9.27539
	0	-1.32548e-11	9.3584
	0	-1.31289e-11	9.44238
	0	-1.53521e-11	9.52539
	0	-2.50424e-11	9.60938
	0	-1.26675e-11	9.69336
	0	-7.55013e-12	9.77637
	0	-1.41776e-11	9.86035
	0	-2.42034e-11	9.94336
	0	-1.63588e-11	10.0273
	0	-1.87918e-11	10.1104
	0	-2.32385e-11	10.1943
	0	-2.43292e-11	10.2773
	0	-2.3658e-11	10.3613
	0	-2.14347e-11	10.4453
	0	-3.71239e-11	10.5283
	0	-5.74646e-12	10.6123
	0.1	1.20846e-08	10.6963
	0.1	2.57225e-09	10.7793
	0	-9.8474e-09	10.8633
	0	-1.40788e-09	10.9463
	0	-6.5601e-10	11.0303
	0	-3.68066e-10	11.1143
	0	-2.67009e-10	11.1973
	0	-1.78034e-10	11.2812
	0	-1.63183e-10	11.3643
	0	-1.24547e-10	11.4482
	0	-9.58117e-11	11.5312
	0	-7.02223e-11	11.6152
	0	-6.21261e-11	11.6982
	0	-7.16067e-11	11.7822
	0	-2.69301e-11	11.8652
	0	-4.89957e-11	11.9492
	0	-5.81827e-11	12.0332
	0	-2.99924e-11	12.1162
	0	-2.27771e-11	12.2002
	0	-2.76013e-11	12.2832
	0	-3.17543e-11	12.3672
	0	-4.1235e-11	12.4502
	0	-2.34063e-11	12.5342
	0	-2.50004e-11	12.6172
	0	-2.30707e-11	12.7012
	0	-1.4639e-11	12.7842
	0	-1.3884e-11	12.8682
	0	-2.57555e-11	12.9521
	0	-1.67771e-12	13.0352
	0	-3.06193e-12	13.1191
	0	-2.29449e-11	13.2021
	0	-5.17225e-11	13.2861
	0	-1.68621e-11	13.3691
	0	-2.47907e-11	13.4531
	0	-1.87918e-11	13.5361
	0	-1.70719e-11	13.6201
	0	-1.27934e-11	13.7031
	0	-2.10571e-11	13.7871
	0	-2.72657e-11	13.8711
	0	-1.92113e-11	13.9541
	0	-1.19544e-11	14.0381
	0	-2.18961e-11	14.1211
